# Supplementary material for: m6a Methylation Inhibition by Cycloleucine Impaired Porcine Oocyte Meiosis and Early Embryonic Development via Remodeling Histone Modifications and Altering Metabolism Related Gene Expression in Blastocysts
Source: Research Square preprint supplement (doi:10.21203/rs.3.rs-104068/v1), 2020-11-12
Supplement: Supplementary file 1 [file 5c902ebe8ac09cd9d507cf35.xlsx]

## Sheet: Sheet1
Table S1 The primers used for RT-qPCR in this study.
Gene	GenBank No.	Primer(5' to 3')	Products(bp)	Temperature(°C)
EFNB2	NM_001114286.1	F: CGTGTGGAAGTACTGCTGGG	249	60
		R: GTGCATCTGTCTGCTTGGTC
HAS2	NM_214053.1	F: TTGGAGTTTCTCTCCTCCTTGG	216	60
		R: CGATGCAAAGAGCGACAGTT
PTX3	NM_001244783.1	F: CCCGGCAACACCAATGAAAC	269	60
		R: CGTTGACCCACAAGGCTACA
p53	NM_213824.3	F: CCACCATCCACTACAACTTC	135	60
		R: AAACACGCACCTCAAAGC
BAX	XM_003127290.4	F: TGCTTCAGGGTTTCATCC	112	60
		R: AGACACTCGCTCAACTTC
BCL2	AF216205.1	F: CTTACCTGAATGACCACCTAGAGC	182	60
		R: CCGACTGAAGAGCGAACCC
OCT4	NM_001113060.1	F: GTCGCCAGAAGGGCAAAC	158	60
		R: CAGGGTGGTGAAGTGAGGG
NANOG	XM_021092390.1	F: CCCCGAAGCATCCATTTCC	101	60
		R: CGAGGGTCTCAGCAGATGACAT
METTL3	XM_003128580.5	F: CTACTCTTGTGACCTATGCTGAT	201	60
		R: GCTCCTTGGCTACTTCTGATG
METTL14	XM_003129231.6	F: TTGACATCAGAGAACTAACACC	184	60
		R: CCAGAACCACACCAGAGAA
WTAP	XM_005659114.3	F: TGGCTCAGTACCAACAGCAG	106	60
		R: CGACTGCAGTCTTTCCCTGT
GAPDH	NM_001206359.1	F:AGGTCGGAGTGAACGGATTTG	117	60
		R: CCATGTAGTGGAGGTCAATGAAG
